# Supplementary material for: Profound importance of the conventional O–H⋯O hydrogen bond versus a considerable blue shift of the Csp2–H bond in complexes of substituted carbonyls and carboxyls
Source: Royal Society of Chemistry journal article supplement (doi:10.1039/d4cp00814f), 2024-01-01
Supplement: d4cp00814f1.pdf [file d4cp00814f1.pdf]

**Profound Importance of Conventional O-H...O Hydrogen Bond versus Considerable Blue Shift of C<sub>sp2</sub>-H bond in the Complexes of Substituted Carbonyls and Carboxyls**

**Nguyen Truong An,<sup>1,2</sup> Vu Thi Ngan,<sup>1</sup> Nguyen Tien Trung\*<sup>1</sup>**

<sup>1</sup>Laboratory of Computational Chemistry and Modelling (LCCM), Department of Chemistry, Faculty of Natural Sciences, Quy Nhon University, 170 An Duong Vuong Street, Quy Nhon City, 590000, Vietnam.

<sup>2</sup>Department of Computational Chemistry, J. Heyrovsky Institute of Physical Chemistry, Czech Academy of Sciences, Dolejskova 2155/3, 18223 Prague 8, Czech Republic.

Corresponding author: [nguyentienchung@qnu.edu.vn](mailto:nguyentienchung@qnu.edu.vn)

Table S1. Selected typically computational parameters at MP2/6-311++G(2d,2p), the DPE values of O-H and C<sub>sp2</sub>-H bonds and PA at the O site of the C=O group in the isolated monomers at CCSD(T)/aug-cc-pVTZ//MP2/6-311++G(2d,2p) and some experimental results (in parentheses) taken from NIST webpage

| Monomer                      | HCOOH                                | FCOOH                | ClCOOH          | BrCOOH              | CH <sub>3</sub> COOH |
|------------------------------|--------------------------------------|----------------------|-----------------|---------------------|----------------------|
| r(O-H)/Å                     | 0.9675                               | 0.9645               | 0.9678          | 0.9689              | 0.9668               |
| r(C=O)/Å                     | 1.2050                               | 1.1908               | 1.1939          | 1.1934              | 1.2099               |
| σ*(O-H)/e                    | 0.0309                               | 0.0241               | 0.0296          | 0.0314              | 0.0295               |
| ν(O-H) (cm <sup>-1</sup> )   | 3775.91                              | 3828.55              | 3775.38         | 3757.87             | 3785.16              |
| PA(O) <sub>C=O</sub>         | 743.1 (742)                          | 701.1                | 727.9           | 735.3               | 788.3 (783.7)        |
| DPE(O-H)                     | 1441.0 (1445.0)                      | 1367.2               | 1293.3          | 1266.6              | 1456.5 (1457.0)      |
| Monomer                      | CH <sub>3</sub> CH <sub>2</sub> COOH | NH <sub>2</sub> COOH | HCHO            | CH <sub>3</sub> CHO | NH <sub>2</sub> CHO  |
| r(C/O-H)/Å                   | 0.9668                               | 0.963918             | 1.0988          | 1.1041              | 1.0986               |
| r(C=O)/Å                     | 1.2105                               | 1.2125               | 1.2131          | 1.2155              | 1.2178               |
| σ*(C/O-H)/e                  | 0.0299                               | 0.0255               | 0.0704          | 0.0814              | 0.08173              |
| ν(C/O-H) (cm <sup>-1</sup> ) | 3784.9                               | 3831.59              | 3009.51         | 2952.15             | 3021.26              |
| PA(O) <sub>C=O</sub>         | 797.8 (797.2)                        | 816.0                | 712.0 (711.5)   | 771.3 (768.5)       | 832.6 (822.2)        |
| DPE(O/C <sub>sp2</sub> -H)   | 1454.0 (1454.0)                      | 1453.9               | 1650.2 (1650.7) | 1642.0 (1645.1)     | 1628.7 (1505.0)      |

PA: Proton Affinity, DPE: Deprotonation Enthalpy; energy given in kJ.mol<sup>-1</sup>

Table S2. The intermolecular distances  $R(H\cdots O)$ , selected parameters at the BCPs of  $H\cdots O$  contacts and individual hydrogen bond energies ( $E_{HB}$ ) at MP2/6-311++G(2d,2p)

| Complex                             | Contacts   | $R(H\cdots O)$<br>(Å) | $\rho(r)$<br>(au) | $\nabla^2\rho(r)$<br>(au) | $H(r)$<br>(au) | $E_{HB}$<br>(kJ.mol <sup>-1</sup> ) |
|-------------------------------------|------------|-----------------------|-------------------|---------------------------|----------------|-------------------------------------|
| <b>H-H</b>                          | C1-H2...O6 | 2.37                  | 0.0122            | 0.041                     | 0.0011         | -10.5                               |
|                                     | O7-H8...O3 | 1.78                  | 0.0362            | 0.106                     | -0.0022        | -40.5                               |
| <b>H-F</b>                          | C1-H2...O6 | 2.41                  | 0.0110            | 0.038                     | 0.0011         | -9.6                                |
|                                     | O7-H8...O3 | 1.72                  | 0.0415            | 0.118                     | -0.0037        | -48.5                               |
| <b>H-Cl</b>                         | C1-H2...O6 | 2.41                  | 0.0111            | 0.038                     | 0.0011         | -9.6                                |
|                                     | O7-H8...O3 | 1.72                  | 0.0415            | 0.116                     | -0.0038        | -48.2                               |
| <b>H-Br</b>                         | C1-H2...O6 | 2.41                  | 0.0111            | 0.038                     | 0.0011         | -9.6                                |
|                                     | O7-H8...O3 | 1.72                  | 0.0418            | 0.116                     | -0.0040        | -48.6                               |
| <b>H-CH<sub>3</sub></b>             | C1-H2...O6 | 2.34                  | 0.0128            | 0.043                     | 0.0012         | -11.1                               |
|                                     | O7-H8...O3 | 1.80                  | 0.0347            | 0.100                     | -0.0018        | -38.6                               |
| <b>H-C<sub>2</sub>H<sub>5</sub></b> | C1-H2...O6 | 2.34                  | 0.0128            | 0.044                     | 0.0012         | -11.2                               |
|                                     | O7-H8...O3 | 1.80                  | 0.0345            | 0.102                     | -0.0018        | -38.4                               |
| <b>H-NH<sub>2</sub></b>             | C1-H2...O6 | 2.31                  | 0.0136            | 0.047                     | 0.0014         | -11.9                               |
|                                     | O7-H8...O3 | 1.78                  | 0.0357            | 0.106                     | -0.0021        | -40.1                               |

Table S2. Continued

| Complex                                          | Contacts   | $R(H\cdots O)$<br>(Å) | $\rho(r)$<br>(au) | $\nabla^2\rho(r)$<br>(au) | $H(r)$<br>(au) | $E_{HB}$<br>(kJ.mol <sup>-1</sup> ) |
|--------------------------------------------------|------------|-----------------------|-------------------|---------------------------|----------------|-------------------------------------|
| <b>CH<sub>3</sub>-H</b>                          | C1-H2...O6 | 2.37                  | 0.0122            | 0.041                     | 0.0011         | -10.5                               |
|                                                  | O7-H8...O3 | 1.74                  | 0.0395            | 0.112                     | -0.0032        | -45.2                               |
| <b>CH<sub>3</sub>-F</b>                          | C1-H2...O6 | 2.41                  | 0.0110            | 0.038                     | 0.0011         | -9.6                                |
|                                                  | O7-H8...O3 | 1.68                  | 0.0457            | 0.124                     | -0.0053        | -54.6                               |
| <b>CH<sub>3</sub>-Cl</b>                         | C1-H2...O6 | 2.40                  | 0.0112            | 0.038                     | 0.0011         | -9.7                                |
|                                                  | O7-H8...O3 | 1.68                  | 0.0458            | 0.122                     | -0.0055        | -54.5                               |
| <b>CH<sub>3</sub>-Br</b>                         | C1-H2...O6 | 2.40                  | 0.0112            | 0.038                     | 0.0011         | -9.7                                |
|                                                  | O7-H8...O3 | 1.68                  | 0.0463            | 0.122                     | -0.0057        | -55.2                               |
| <b>CH<sub>3</sub>-CH<sub>3</sub></b>             | C1-H2...O6 | 2.35                  | 0.0128            | 0.043                     | 0.0012         | -11.1                               |
|                                                  | O7-H8...O3 | 1.76                  | 0.0378            | 0.109                     | -0.0027        | -42.8                               |
| <b>CH<sub>3</sub>-C<sub>2</sub>H<sub>5</sub></b> | C1-H2...O6 | 2.34                  | 0.0129            | 0.043                     | 0.0012         | -11.1                               |
|                                                  | O7-H8...O3 | 1.76                  | 0.0376            | 0.108                     | -0.0027        | -42.6                               |
| <b>CH<sub>3</sub>-NH<sub>2</sub></b>             | C1-H2...O6 | 2.31                  | 0.0136            | 0.047                     | 0.0013         | -11.9                               |
|                                                  | O7-H8...O3 | 1.75                  | 0.0387            | 0.111                     | -0.0030        | -44.3                               |
| <b>NH<sub>2</sub>-H</b>                          | C1-H2...O6 | 2.32                  | 0.0132            | 0.046                     | 0.0013         | -11.5                               |
|                                                  | O7-H8...O3 | 1.69                  | 0.0452            | 0.123                     | -0.0052        | -53.8                               |
| <b>NH<sub>2</sub>-F</b>                          | C1-H2...O6 | 2.36                  | 0.0121            | 0.043                     | 0.0014         | -10.6                               |
|                                                  | O7-H8...O3 | 1.62                  | 0.0528            | 0.135                     | -0.0082        | -65.9                               |
| <b>NH<sub>2</sub>-Cl</b>                         | C1-H2...O6 | 2.36                  | 0.0121            | 0.043                     | 0.0014         | -10.6                               |
|                                                  | O7-H8...O3 | 1.62                  | 0.0533            | 0.133                     | -0.0087        | -66.5                               |
| <b>NH<sub>2</sub>-Br</b>                         | C1-H2...O6 | 2.36                  | 0.0121            | 0.043                     | 0.0013         | -10.5                               |
|                                                  | O7-H8...O3 | 1.61                  | 0.0541            | 0.133                     | -0.0091        | -67.5                               |
| <b>NH<sub>2</sub>-CH<sub>3</sub></b>             | C1-H2...O6 | 2.30                  | 0.0138            | 0.048                     | 0.0014         | -12.1                               |
|                                                  | O7-H8...O3 | 1.71                  | 0.0431            | 0.119                     | -0.0045        | -50.8                               |
| <b>NH<sub>2</sub>-C<sub>2</sub>H<sub>5</sub></b> | C1-H2...O6 | 2.30                  | 0.0139            | 0.048                     | 0.0014         | -12.2                               |
|                                                  | O7-H8...O3 | 1.71                  | 0.0429            | 0.118                     | -0.0044        | -50.5                               |
| <b>NH<sub>2</sub>-NH<sub>2</sub></b>             | C1-H2...O6 | 2.26                  | 0.0147            | 0.052                     | 0.0016         | -13.03                              |
|                                                  | O7-H8...O3 | 1.70                  | 0.0441            | 0.121                     | -0.0048        | -52.4                               |

Table S3. WBI of the examined complexes calculated at  $\omega$ B97X-D/6-311++G(2d,2p)

| Complex                                          | H-H                | H-F                | H-Cl                | H-Br                | H-CH <sub>3</sub>                | H-C <sub>2</sub> H <sub>5</sub>                | H-NH <sub>2</sub>                |
|--------------------------------------------------|--------------------|--------------------|---------------------|---------------------|----------------------------------|------------------------------------------------|----------------------------------|
| WBI(O $\cdots$ H)/O-H $\cdots$ O                 | 0.0573             | 0.0706             | 0.0709              | 0.0715              | 0.0535                           | 0.053                                          | 0.0558                           |
| WBI(H $\cdots$ O)/C <sub>sp2</sub> -H $\cdots$ O | 0.0054             | 0.0039             | 0.0041              | 0.0041              | 0.0057                           | 0.0057                                         | 0.0063                           |
| Complex                                          | CH <sub>3</sub> -H | CH <sub>3</sub> -F | CH <sub>3</sub> -Cl | CH <sub>3</sub> -Br | CH <sub>3</sub> -CH <sub>3</sub> | CH <sub>3</sub> -C <sub>2</sub> H <sub>5</sub> | CH <sub>3</sub> -NH <sub>2</sub> |
| WBI(O $\cdots$ H)/O-H $\cdots$ O                 | 0.0659             | 0.082              | 0.0832              | 0.0842              | 0.0614                           | 0.0609                                         | 0.0639                           |
| WBI(H $\cdots$ O)/C <sub>sp2</sub> -H $\cdots$ O | 0.0056             | 0.0041             | 0.0043              | 0.0043              | 0.0059                           | 0.0059                                         | 0.0064                           |
| Complex                                          | NH <sub>2</sub> -H | NH <sub>2</sub> -F | NH <sub>2</sub> -Cl | NH <sub>2</sub> -Br | NH <sub>2</sub> -CH <sub>3</sub> | NH <sub>2</sub> -C <sub>2</sub> H <sub>5</sub> | NH <sub>2</sub> -NH <sub>2</sub> |
| WBI(O $\cdots$ H)/O-H $\cdots$ O                 | 0.0806             | 0.1005             | 0.1028              | 0.1046              | 0.0751                           | 0.0745                                         | 0.0779                           |
| WBI(H $\cdots$ O)/C <sub>sp2</sub> -H $\cdots$ O | 0.0067             | 0.0049             | 0.005               | 0.005               | 0.0069                           | 0.0069                                         | 0.0076                           |

Table S4: Comparison of the interaction energies (in kJ.mol<sup>-1</sup>) corrected by both ZPE and BSSE using different levels of theory, including two double hybrid functionals, CCSD(T) and CBS extrapolation.

| Basis set          | 6-311++G(2d,2p) |      |                                     |      | aug-cc-pVTZ  |      | CBS          |
|--------------------|-----------------|------|-------------------------------------|------|--------------|------|--------------|
|                    | DSD-PBEP86      |      | B2GP-PLYP+D2<br>Grimme's dispersion |      | CCSD(T)      |      |              |
| Functional         | $\Delta E^*$    | BSSE | $\Delta E^*$                        | BSSE | $\Delta E^*$ | BSSE | $\Delta E^*$ |
| Complex            |                 |      |                                     |      |              |      |              |
| H-H                | -32.5           | 3.9  | -34.7                               | 3.4  | -31.3        | 3.5  | -36.9        |
| CH <sub>3</sub> -H | -38.2           | 4.4  | -40.4                               | 3.8  | -36.2        | 3.8  | -41.8        |
| NH <sub>2</sub> -H | -47.1           | 4.7  | -49.5                               | 4.1  | -44.2        | 4.3  | -49.9        |

Table S5a. The parameters of the CBS exponential extrapolation in the form of  $E^{\text{HF}}(X) = E_{\text{CBS}}^{\text{HF}} + B \cdot \exp(-\alpha X)$ , for the Hartree-Fock total energies of the structures involved in the H-H, CH<sub>3</sub>-H and NH<sub>2</sub>-H complexes, where  $E^{\text{HF}}(X)$  is the total energy at HF/aug-cc-pVXZ (X=2 for DZ, X=3 for TZ and X=4 for QZ) corrected by the both ZPE and BSSE computed at the corresponding level and  $E_{\text{CBS}}^{\text{HF}}$  is the HF total energy at the CBS limit.

| Complex            | Parameter | Structures involved in the complex |        |         |
|--------------------|-----------|------------------------------------|--------|---------|
|                    |           | Aldehyde                           | HCOOH  | Complex |
| H-H                | $\alpha$  | 1.35                               |        | 1.30    |
|                    | $B$       | 1547.4                             |        | 3747.2  |
| CH <sub>3</sub> -H | $\alpha$  | 1.37                               | 1.32   | 1.32    |
|                    | $B$       | 2126.8                             | 2418.2 | 4303.5  |
| NH <sub>2</sub> -H | $\alpha$  | 1.33                               |        | 1.30    |
|                    | $B$       | 2157.9                             |        | 4340.9  |

Table S5b. The extrapolated HF total energies  $E_{CBS}^{HF}$ , CCSD(T) correlation energies  $E_{CBS}^{corr}$  and the CCSD(T) total energies extrapolated at the CBS limit  $E_{CBS}^{CCSD(T)}$  for the structures involved in the **H-H**, **CH<sub>3</sub>-H** and **NH<sub>2</sub>-H** complexes, where  $E_{CBS}^{CCSD(T)} = E_{CBS}^{HF} + E_{CBS}^{corr}$ . All energetical values are in kJ.mol<sup>-1</sup>.

| <i>Structures involved in the complex</i> |                 |                  |                     |                |                  |                     |                |                  |                     |
|-------------------------------------------|-----------------|------------------|---------------------|----------------|------------------|---------------------|----------------|------------------|---------------------|
| <b>Complex</b>                            | <b>Aldehyde</b> |                  |                     | <b>HCOOH</b>   |                  |                     | <b>Complex</b> |                  |                     |
|                                           | $E_{CBS}^{HF}$  | $E_{CBS}^{corr}$ | $E_{CBS}^{CCSD(T)}$ | $E_{CBS}^{HF}$ | $E_{CBS}^{corr}$ | $E_{CBS}^{CCSD(T)}$ | $E_{CBS}^{HF}$ | $E_{CBS}^{corr}$ | $E_{CBS}^{CCSD(T)}$ |
| <b>H-H</b>                                | -299036.3       | -1209.3          | <b>-300245.6</b>    |                |                  |                     | -794826.2      | -3125.3          | <b>-797951.5</b>    |
| <b>CH<sub>3</sub>-H</b>                   | -401524.1       | -1746.4          | <b>-403270.5</b>    | -495766.3      | -1902.7          | <b>-497669.0</b>    | -897317.9      | -3663.5          | <b>-900981.4</b>    |
| <b>NH<sub>2</sub>-H</b>                   | -443638.8       | -1835.7          | <b>-445474.5</b>    |                |                  |                     | -939439.6      | -3753.8          | <b>-943193.4</b>    |

The correlation energy at CCSD(T)/aug-cc-pVXZ is fitted with the expression of the power form:

$$E^{corr}(X) = E_{CBS}^{corr} + A.X^{-3}$$

Therefore, using the two-point fitting scheme for  $X = 2$  and  $X = 3$  and eliminating the fitting parameter  $A$ , the CCSD(T) correlation energy at the CBS limit can be obtained by the expression:

$$E_{CBS}^{corr} = \frac{E^{corr}(DZ).2^3 - E^{corr}(TZ).3^3}{2^3 - 3^3}$$

in which, the CCSD(T) correlation energies are obtained using the two basis sets aug-cc-pVDZ and aug-cc-pVTZ on the MP2/6-311++G(2d,2p) geometries:

$$E^{corr}(DZ) = E^{CCSD(T)}(DZ) - E^{HF}(DZ); E^{corr}(TZ) = E^{CCSD(T)}(TZ) - E^{HF}(TZ)$$

Table S6. Contributions of different components in the overall interaction energy calculated by using SAPT2+ approach, ( $\Delta E_{SAPT2+}$ , kJ.mol<sup>-1</sup>) with the aug-cc-pVDZ basis set

| <b>Complex</b>                       | <b>E<sub>elst</sub></b> | <b>E<sub>ind</sub></b> | <b>E<sub>disp</sub></b> | <b><math>\delta E_{int,r}^{HF}</math></b> | <b>E<sub>exch</sub></b> | <b><math>\Delta E_{SAPT2+}</math></b> |
|--------------------------------------|-------------------------|------------------------|-------------------------|-------------------------------------------|-------------------------|---------------------------------------|
| <b>H-H</b>                           | -65.3(47.7)             | -39.0(28.5)            | -21.8(15.9)             | -10.9(7.9)                                | 86.5                    | -50.5                                 |
| <b>H-F</b>                           | -71.2(47.4)             | -44.2(29.4)            | -22.2(14.8)             | -12.7(8.4)                                | 93.3                    | -57.0                                 |
| <b>H-Cl</b>                          | -70.8(46.6)             | -44.9(29.6)            | -23.0(15.1)             | -13.2(8.7)                                | 95.9                    | -55.9                                 |
| <b>H-Br</b>                          | -71.1(46.2)             | -45.8(29.8)            | -23.4(15.2)             | -13.5(8.8)                                | 97.9                    | -55.9                                 |
| <b>H-CH<sub>3</sub></b>              | -63.6(47.8)             | -37.2(27.9)            | -22.1(16.6)             | -10.2(7.7)                                | 84.1                    | -49.0                                 |
| <b>H-C<sub>2</sub>H<sub>5</sub></b>  | -63.3(47.6)             | -37.1(27.9)            | -22.3(16.8)             | -10.2(7.7)                                | 84.1                    | -48.7                                 |
| <b>H-NH<sub>2</sub></b>              | -66.5(48.0)             | -38.6(27.9)            | -22.6(16.4)             | -10.6(7.7)                                | 87.1                    | -51.3                                 |
| <b>CH<sub>3</sub>-H</b>              | -71.8(47.1)             | -44.1(28.9)            | -23.9(15.7)             | -12.6(8.3)                                | 96.6                    | -55.7                                 |
| <b>CH<sub>3</sub>-F</b>              | -79.7(46.9)             | -50.9(29.9)            | -24.4(14.4)             | -14.9(8.8)                                | 105.8                   | -64.1                                 |
| <b>CH<sub>3</sub>-Cl</b>             | -79.5(46.1)             | -51.9(30.1)            | -25.4(14.8)             | -15.6(9.0)                                | 109.3                   | -63.2                                 |
| <b>CH<sub>3</sub>-Br</b>             | -80.1(45.7)             | -53.1(30.3)            | -25.9(14.8)             | -16.1(9.2)                                | 111.9                   | -63.4                                 |
| <b>CH<sub>3</sub>-CH<sub>3</sub></b> | -69.3(47.2)             | -41.8(28.4)            | -24.1(16.4)             | -11.7(8.0)                                | 93.5                    | -53.6                                 |

|                                                  |             |             |             |            |       |       |
|--------------------------------------------------|-------------|-------------|-------------|------------|-------|-------|
| <b>CH<sub>3</sub>-C<sub>2</sub>H<sub>5</sub></b> | -69.0(47.0) | -41.7(28.4) | -24.3(16.6) | -11.7(8.0) | 93.4  | -53.3 |
| <b>CH<sub>3</sub>-NH<sub>2</sub></b>             | -72.0(47.4) | -43.2(28.4) | -24.6(16.2) | -12.1(8.0) | 96.2  | -55.7 |
| <b>NH<sub>2</sub>-H</b>                          | -87.8(47.2) | -55.0(29.6) | -27.1(14.5) | -16.2(8.7) | 118.8 | -67.3 |
| <b>NH<sub>2</sub>-F</b>                          | -98.3(46.9) | -63.8(30.5) | -27.9(13.3) | -19.4(9.3) | 131.1 | -78.3 |
| <b>NH<sub>2</sub>-Cl</b>                         | -98.5(46.0) | -65.8(30.8) | -29.2(13.6) | -20.5(9.6) | 136.4 | -77.6 |
| <b>NH<sub>2</sub>-Br</b>                         | -99.4(45.5) | -67.6(31.0) | -29.8(13.6) | -21.3(9.9) | 140.1 | -78.0 |
| <b>NH<sub>2</sub>-CH<sub>3</sub></b>             | -84.4(47.3) | -52.0(29.1) | -27.2(15.2) | -15.0(8.4) | 114.3 | -64.3 |
| <b>NH<sub>2</sub>-C<sub>2</sub>H<sub>5</sub></b> | -83.9(47.1) | -51.9(29.1) | -27.4(15.4) | -15.0(8.4) | 114.3 | -64.0 |
| <b>NH<sub>2</sub>-NH<sub>2</sub></b>             | -87.3(47.5) | -53.4(29.1) | -27.7(15.0) | -15.4(8.4) | 117.2 | -66.7 |

Values in parentheses are the percentages (%) of the corresponding energy components contributing to interaction energy of the complexes

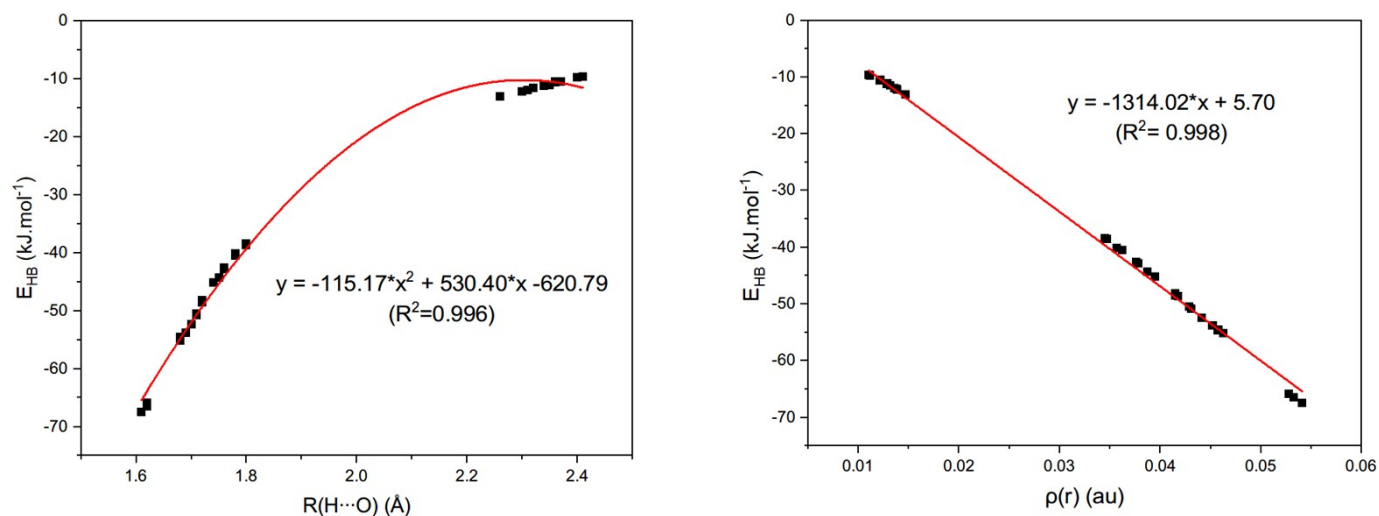

Figure S1. The high correlations between individual hydrogen-bonded energies ( $E_{HB}$ ,  $\text{kJ}\cdot\text{mol}^{-1}$ ) and the intermolecular distances ( $R(\text{H}\cdots\text{Z})$ , Å) and electron density ( $\rho(r)$ , au)

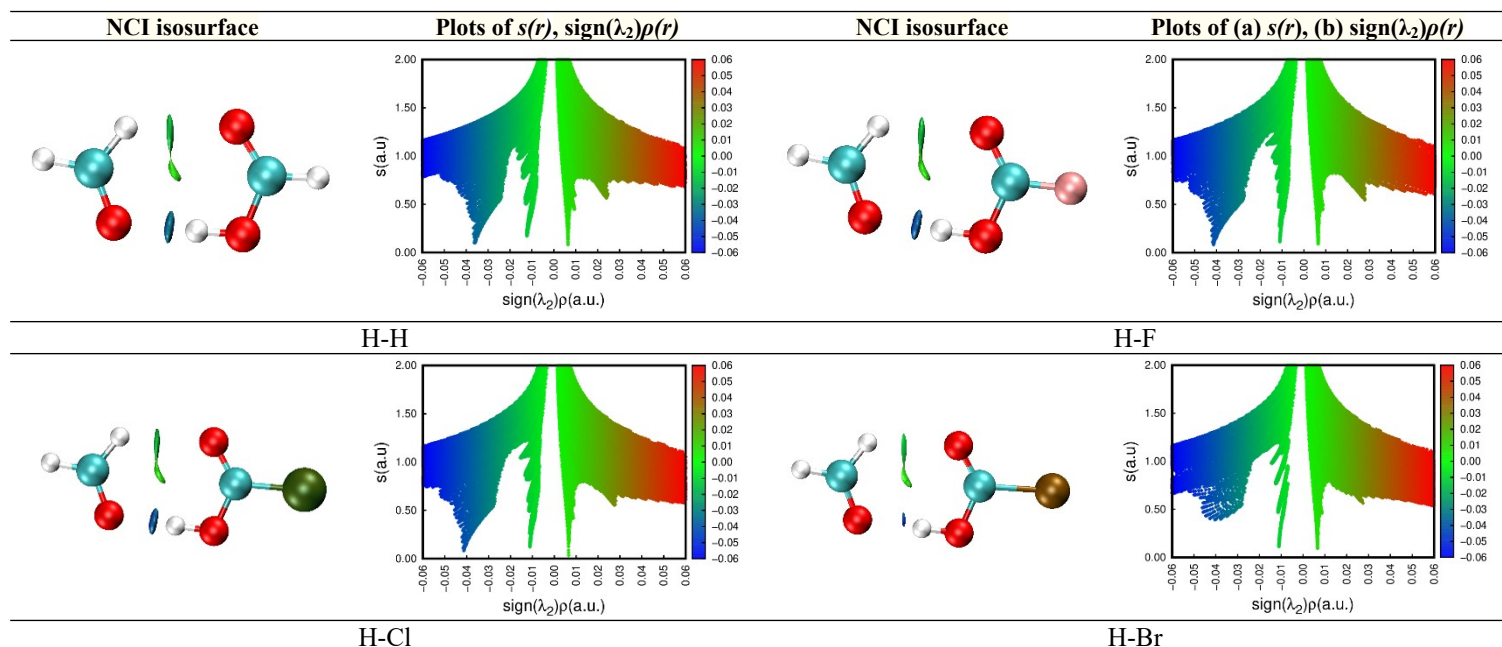

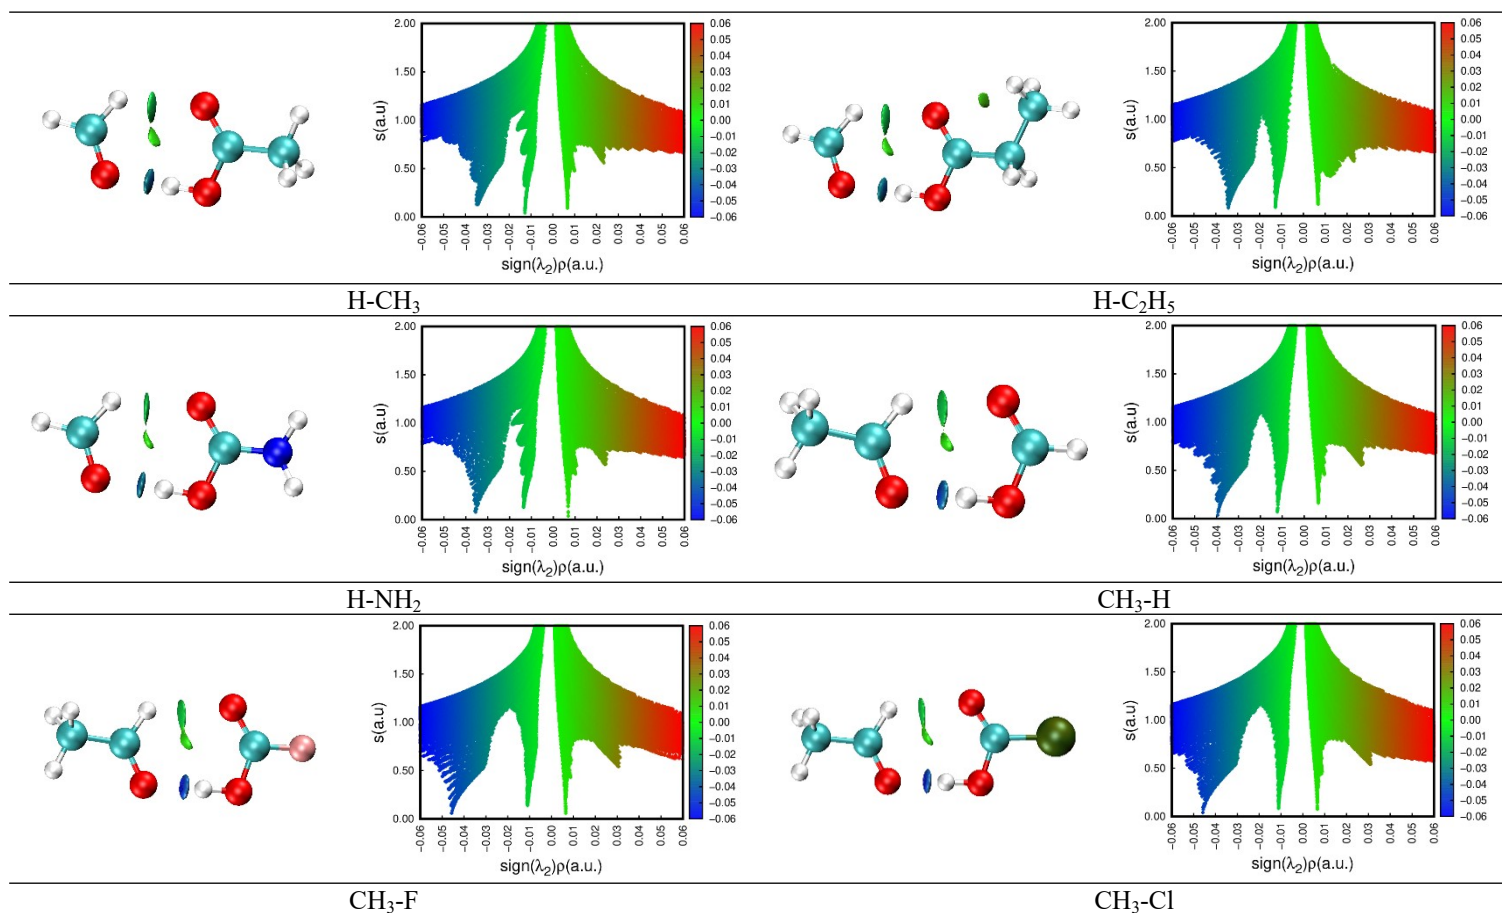

Figure S2a. NCI isosurface and plots of  $s(r)$  as a function of  $\text{sign}(\lambda_2)\rho(r)$  for all complexes  
 (The surfaces are colored on a blue-green-red scale according to the values of  $\text{sign}(\lambda_2)\rho(r)$  ranging from  $-0.04$  to  $0.04$  au)

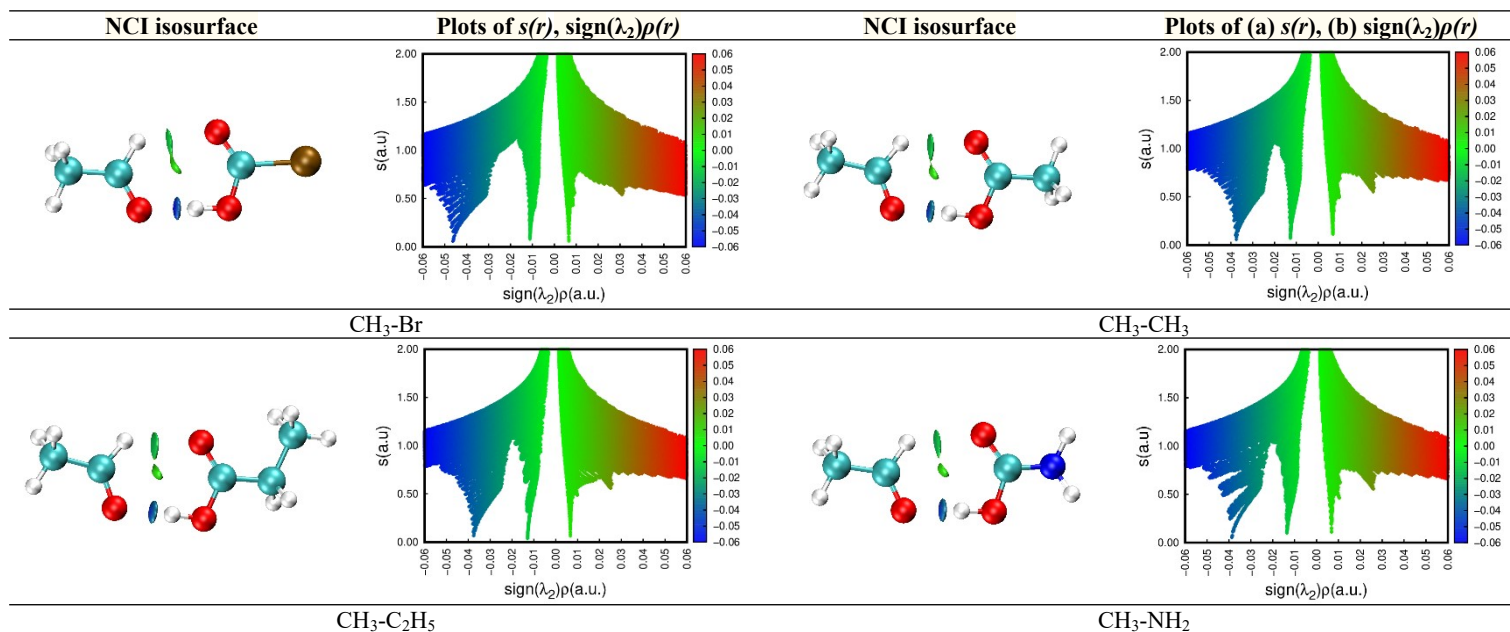

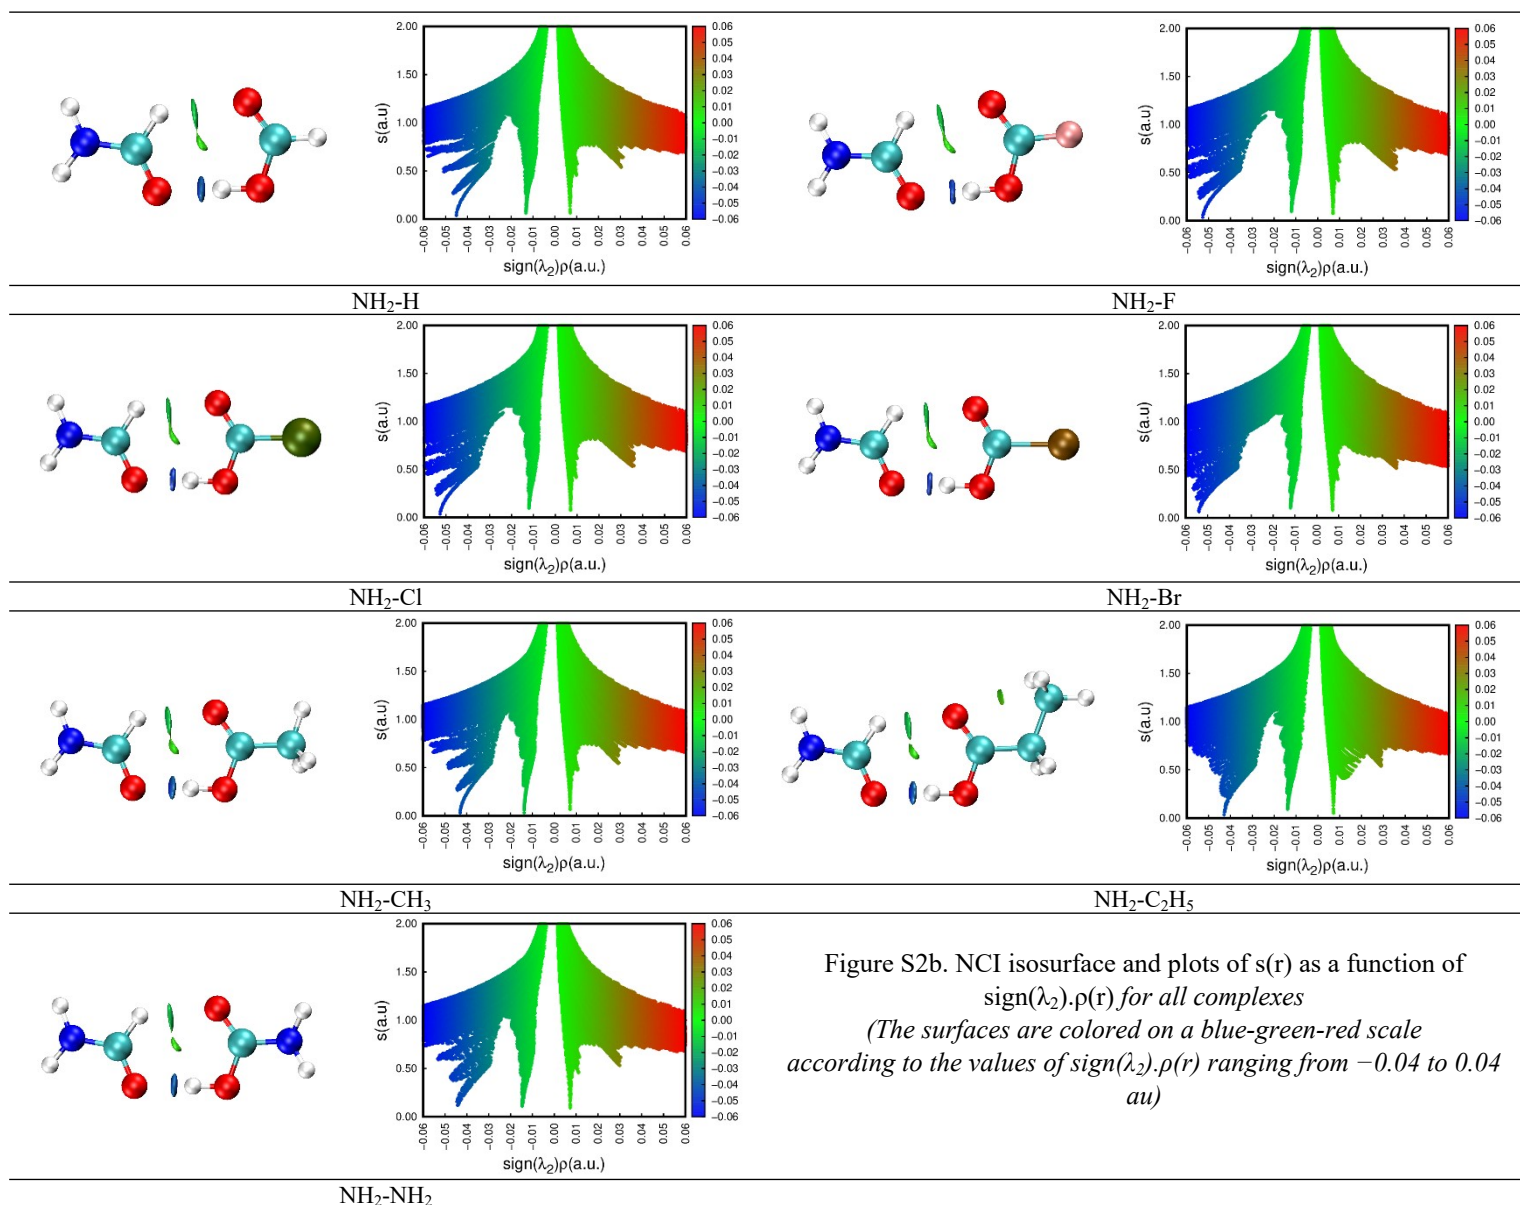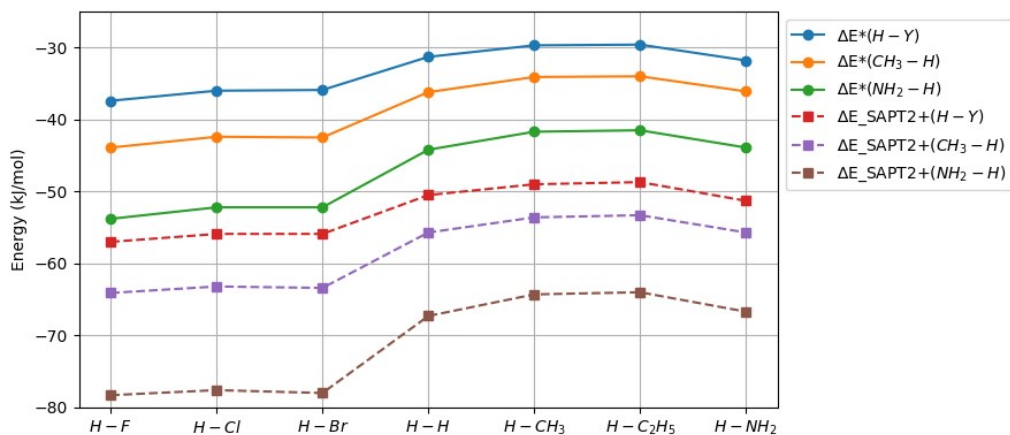

Figure S3. Relationships of the interaction energies ( $\Delta E^*$  and  $\Delta E_{SAPT2+}$ ) and the substituent Y for the investigated complexes



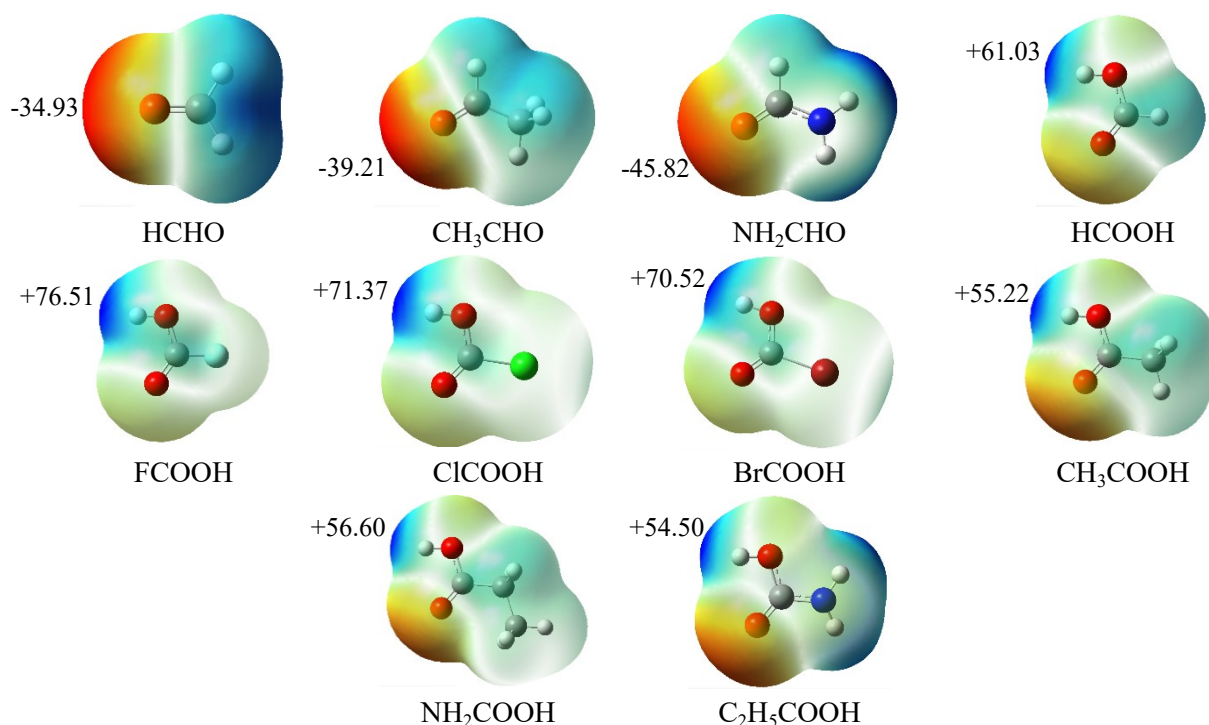

Figure S4. MEP on the surface of monomers plotted at MP2/6-311++G(2d,2p) (isovalue = 0.0004 au) with the values of the maximum surface electrostatic potential ( $V_{s,max}$ ) at H atom of OH group in YCOOH and the minimum surface electrostatic potential ( $V_{s,min}$ ) at O atom of C=O group in XCHO

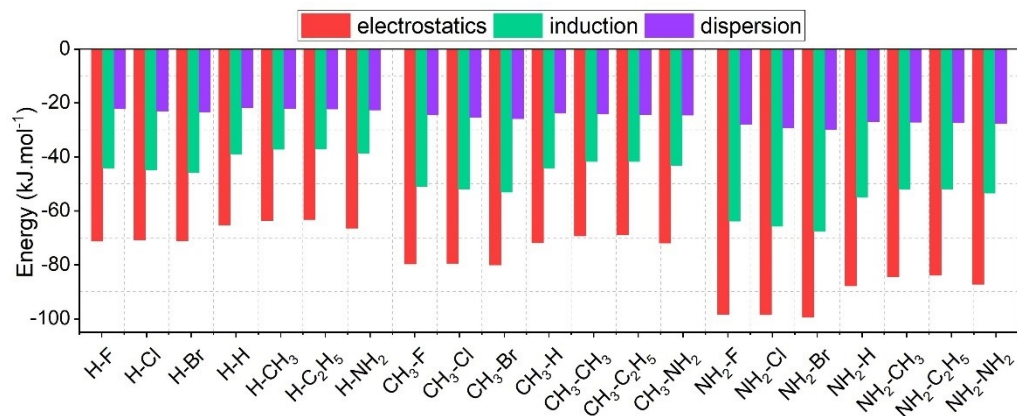

Figure S5. Contributions of different energetic components into interaction energy of the complexes

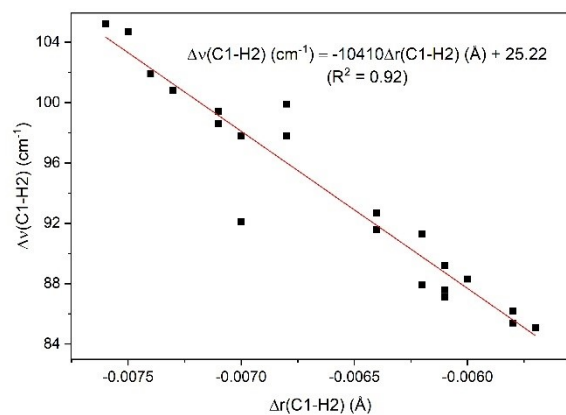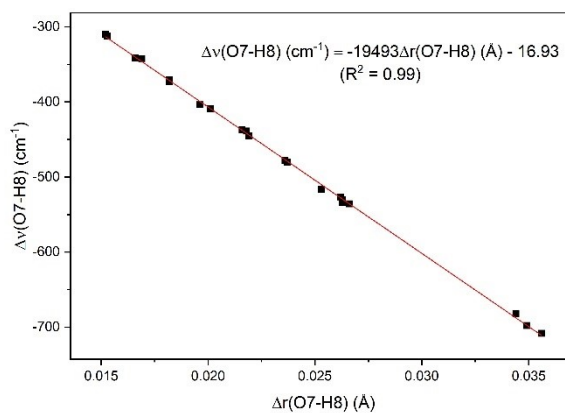



(a)

(b)

Figure S6. The linear correlations of the changes of the  $C_{sp^2}$ -H and O-H stretching vibrational frequencies versus the changes of their corresponding bond lengths

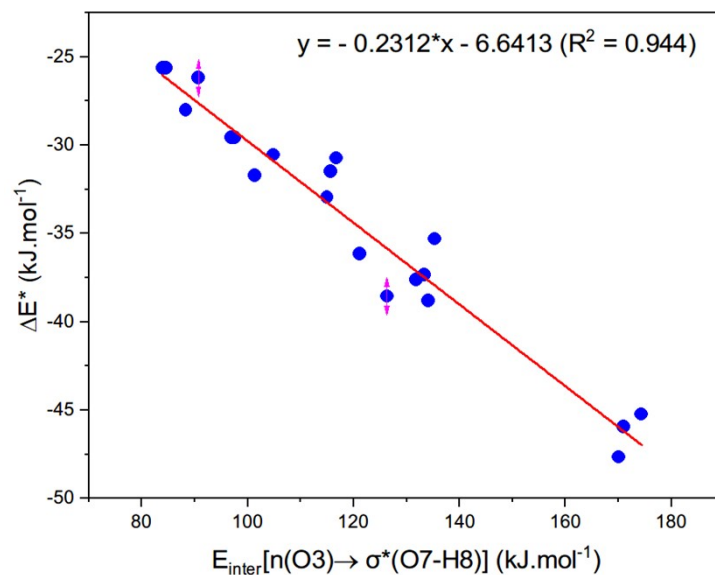

Figure S7. The linear correlation between the interaction energy of complexes and intermolecular hyperconjugation energy of the charge-transfer interaction derived from  $n(O3)$  lone pair to  $\sigma^*(O7-H8)$  orbital

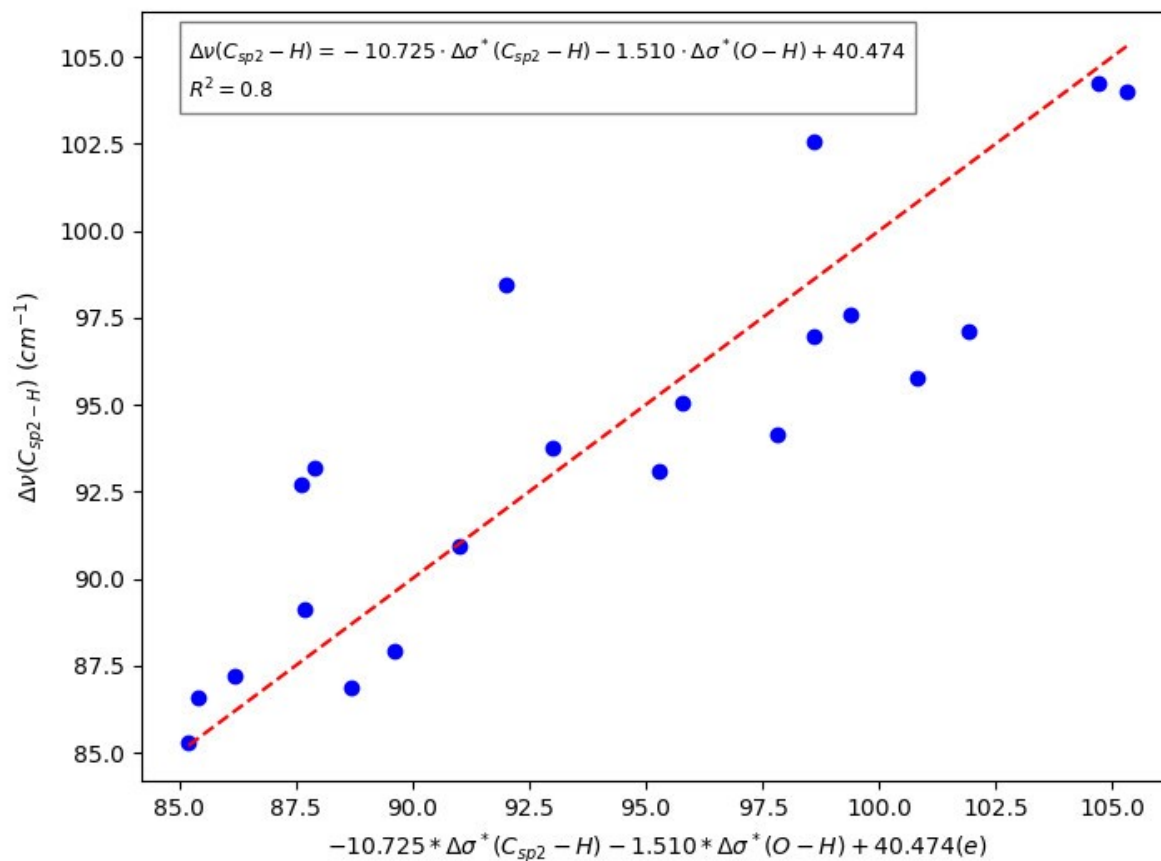

Figure S8. The linear correlation between changes of C<sub>sp2</sub>-H stretching frequency  $\Delta\nu(\text{C}_{\text{sp}2}\text{-H})$  versus  $\Delta\sigma^*(\text{C}_{\text{sp}2}\text{-H})$  and  $\Delta\sigma^*(\text{O-H})$  values
